# Supplementary material for: Reaction of HO with hydroxyacetone (HOCH2C(O)CH3): rate coefficients (233–363 K) and mechanism
Source: Royal Society of Chemistry journal article supplement (doi:10.1039/b513056e), 2005-11-28
Supplement: b513056e-esi1.pdf [file b513056e-esi1.pdf]

## Supplementary Information to:

### Reaction of HO with Hydroxyacetone (HOCH<sub>2</sub>C(O)CH<sub>3</sub>): Rate Coefficients (233 - 363 K) and Mechanism

Terry J. Dillon, Abraham Horowitz,<sup>#</sup> Dirk Hölscher and John N. Crowley\*  
Max-Planck-Institut für Chemie, Division of Atmospheric Chemistry  
55020 Mainz, Germany

Luc Vereecken and Jozef Peeters  
Katholieke Universiteit Leuven, Division of Quantum Chemistry and Physical Chemistry  
Celestijnenlaan 200 F, 3001 Heverlee-Leuven, Belgium

## Summary of rate coefficients and conditions.

| T / K | OH source / bath gas                         | n <sup>a</sup> | [HOCH <sub>2</sub> C(O)CH <sub>3</sub> ] <sub>b</sub> | k <sub>1</sub> <sup>c</sup> | ±  |
|-------|----------------------------------------------|----------------|-------------------------------------------------------|-----------------------------|----|
| 233   | 248 nm O <sub>3</sub> + CH <sub>4</sub> / He | 7              | 2 – 12                                                | 803                         | 74 |
| 233   | 248 nm O <sub>3</sub> + CH <sub>4</sub> / He | 8              | 2 – 17                                                | 762                         | 84 |
| 233   | 248 nm O <sub>3</sub> + CH <sub>4</sub> / He | 9              | 3 – 25                                                | 747                         | 43 |
| 233   | 248 nm O <sub>3</sub> + CH <sub>4</sub> / He | 8              | 3 – 25                                                | 902                         | 81 |
| 237   | 351 nm HONO / N <sub>2</sub>                 | 7              | 2 – 14                                                | 773                         | 95 |
| 237   | 351 nm HONO / N <sub>2</sub>                 | 8              | 2 – 22                                                | 824                         | 36 |
| 237   | 351 nm HONO / N <sub>2</sub>                 | 8              | 2 – 18                                                | 869                         | 86 |
| 238   | 351 nm HONO / N <sub>2</sub>                 | 7              | 2 – 22                                                | 717                         | 63 |
| 238   | 351 nm HONO / N <sub>2</sub>                 | 8              | 4 – 24                                                | 752                         | 77 |
| 238   | 351 nm HONO / air                            | 5              | 3 - 22                                                | 747                         | 99 |
| 243   | 248 nm O <sub>3</sub> + CH <sub>4</sub> / He | 8              | 2 – 13                                                | 838                         | 81 |
| 243   | 248 nm O <sub>3</sub> + CH <sub>4</sub> / He | 9              | 6 – 61                                                | 760                         | 18 |
| 243   | 351 nm HONO / N <sub>2</sub>                 | 7              | 4 - 28                                                | 747                         | 49 |
| 252   | 351 nm HONO / N <sub>2</sub>                 | 7              | 2 – 25                                                | 752                         | 46 |
| 253   | 248 nm O <sub>3</sub> + CH <sub>4</sub> / He | 7              | 5 – 60                                                | 673                         | 33 |
| 260   | 351 nm HONO / N <sub>2</sub>                 | 8              | 6 - 65                                                | 670                         | 43 |
| 263   | 351 nm HONO / N <sub>2</sub>                 | 8              | 4 - 42                                                | 716                         | 23 |
| 268   | 248 nm O <sub>3</sub> + CH <sub>4</sub> / He | 8              | 4 – 41                                                | 652                         | 26 |
| 273   | 351 nm HONO / N <sub>2</sub>                 | 7              | 6 - 35                                                | 627                         | 53 |
| 273   | 351 nm HONO / N <sub>2</sub>                 | 7              | 4 – 36                                                | 687                         | 23 |

|     |                                                       |    |                   |     |    |
|-----|-------------------------------------------------------|----|-------------------|-----|----|
| 283 | 248 nm O <sub>3</sub> + CH <sub>4</sub> / He          | 7  | 5 – 70            | 587 | 26 |
| 288 | 351 nm HONO / N <sub>2</sub> / O <sub>2</sub>         | 7  | 5 – 49            | 637 | 21 |
| 298 | 248 nm O <sub>3</sub> + CH <sub>4</sub> / He          | 6  | 6 – 49            | 614 | 28 |
| 298 | 248 nm O <sub>3</sub> + CH <sub>4</sub> / He          | 11 | 7 – 71            | 574 | 38 |
| 298 | 248 nm O <sub>3</sub> + CH <sub>4</sub> / He          | 11 | 5 – 102           | 561 | 23 |
| 298 | 248 nm O <sub>3</sub> + CH <sub>4</sub> / He          | 8  | 8 – 82            | 584 | 36 |
| 298 | 248 nm O <sub>3</sub> + CH <sub>4</sub> / He          | 6  | 8 – 48            | 586 | 13 |
| 298 | 248 nm O <sub>3</sub> + CH <sub>4</sub> / He          | 5  | 7 – 60<br>N-valve | 584 | 20 |
| 298 | 248 nm D <sub>2</sub> O <sub>2</sub> / N <sub>2</sub> | 7  | 5 - 43            | 647 | 8  |
| 298 | 351 nm HONO / N <sub>2</sub>                          | 6  | 4 - 35            | 622 | 41 |
| 298 | 351 nm HONO / N <sub>2</sub>                          | 6  | 4 - 40            | 589 | 46 |
| 298 | 351 nm HONO / N <sub>2</sub>                          | 7  | 6 – 40            | 608 | 30 |
| 298 | 351 nm HONO / N <sub>2</sub>                          | 6  | 9 - 51            | 599 | 23 |
| 298 | 351 nm HONO / N <sub>2</sub>                          | 8  | 4 – 48            | 615 | 23 |
| 298 | 351 nm HONO / N <sub>2</sub>                          | 7  | 4 – 52            | 592 | 28 |
| 298 | 351 nm HONO / N <sub>2</sub>                          | 8  | 9 – 37            | 606 | 26 |
| 298 | 351 nm HONO / N <sub>2</sub>                          | 7  | 9 – 51            | 579 | 25 |
| 298 | 351 nm HONO / N <sub>2</sub> / O <sub>2</sub>         | 8  | 9 - 58            | 589 | 20 |
| 318 | 351 nm HONO / N <sub>2</sub>                          | 7  | 9 – 69            | 584 | 16 |
| 326 | 351 nm HONO / N <sub>2</sub>                          | 6  | 8 - 58            | 618 | 56 |
| 328 | 248 nm O <sub>3</sub> + CH <sub>4</sub> / He          | 7  | 6 – 65            | 566 | 30 |
| 338 | 351 nm HONO / N <sub>2</sub>                          | 7  | 8 – 67            | 536 | 13 |
| 343 | 351 nm HONO / N <sub>2</sub>                          | 8  | 8 - 46            | 532 | 31 |
| 358 | 351 nm HONO / N <sub>2</sub>                          | 6  | 7 - 49            | 543 | 46 |
| 358 | 351 nm HONO / N <sub>2</sub>                          | 6  | 8 - 60            | 510 | 20 |
| 363 | 248 nm O <sub>3</sub> + CH <sub>4</sub> / He          | 8  | 7 – 70            | 444 | 30 |

Notes: <sup>a</sup> n is the number of  $k'$  (or  $k'_{init}$ ) values collected, <sup>b</sup> units are  $10^{13}$  molecule  $\text{cm}^{-3}$ , <sup>c</sup> units are  $10^{-14}$   $\text{cm}^3$  molecule<sup>-1</sup> s<sup>-1</sup>, errors are 2  $\sigma$  statistical only, incorporating scatter in both  $k'$  and  $[\text{HOCH}_2\text{C}(\text{O})\text{CH}_3]$ . N-valve : Teflon needle valve used in place of flow controller.
