# Supplementary material for: Reaction of HO with hydroxyacetone (HOCH2C(O)CH3): rate coefficients (233–363 K) and mechanism
Source: Royal Society of Chemistry journal article supplement (doi:10.1039/b513056e), 2005-11-28
Supplement: b513056e-esi2.pdf [file b513056e-esi2.pdf]

# Reaction of HO with Hydroxyacetone (HOCH<sub>2</sub>C(O)CH<sub>3</sub>): Rate Coefficients (233 - 363 K) and Mechanism.

Terry J. Dillon, Abraham Horowitz, Dirk Hölscher, John N. Crowley, Luc Vereecken, Jozef Peeters

## SUPPORTING INFORMATION

CH<sub>3</sub>COCH<sub>2</sub>OH

-----  
E(RB+HF-LYP/6-311++G(2df,2pd)) (Hartree): -268.475447936

E(CCSD(T)/6-311G(d,p)) (Hartree): -267.78101793

E(MP2/6-311G(d,p)) (Hartree): -267.71563195

E(MP3/6-311G(d,p)) (Hartree): -267.73768696

Electronic state : 1-A

Cartesian coordinates (Angs):

|   |           |           |           |
|---|-----------|-----------|-----------|
| C | 0.473655  | 0.159849  | -0.014378 |
| O | 0.291462  | 1.357891  | -0.012129 |
| C | 1.846228  | -0.457933 | 0.013848  |
| C | -0.723048 | -0.773656 | -0.028584 |
| H | 2.079510  | -0.751899 | 1.040316  |
| H | 1.895396  | -1.357436 | -0.600360 |
| H | 2.588243  | 0.264844  | -0.315496 |
| H | -0.666868 | -1.380720 | -0.942452 |
| H | -0.636075 | -1.470725 | 0.814482  |
| O | -1.933702 | -0.075404 | 0.031869  |
| H | -1.703290 | 0.866484  | 0.020272  |

Rotational constants (GHz): 10.1531600 3.8097200 2.8693700

Vibrational harmonic frequencies (cm<sup>-1</sup>):

|           |           |           |
|-----------|-----------|-----------|
| 47.1168   | 131.0513  | 276.8287  |
| 407.6845  | 419.7609  | 493.7989  |
| 619.0672  | 807.6016  | 859.8321  |
| 978.0131  | 1095.1176 | 1115.1782 |
| 1204.8168 | 1257.1477 | 1303.8703 |
| 1393.8135 | 1436.1016 | 1465.3171 |
| 1478.7075 | 1482.8819 | 1776.9162 |
| 2980.7721 | 3002.4320 | 3037.0122 |
| 3094.8983 | 3142.1786 | 3694.6213 |

Zero-point correction (Hartree): 0.088854

OH

--

E(UB+HF-LYP/6-311++G(2df,2pd)) (Hartree): -75.7655727121

E(UHF/6-311G(d,p)) (Hartree): -75.4102023317

E(CCSD(T)/6-311G(d,p)) (Hartree): -75.58917125

E(MP2/6-311G(d,p)) (Hartree): -75.57283875

E(MP3/6-311G(d,p)) (Hartree): -75.58383839

E(PMP2/6-311G(d,p)) (Hartree): -75.57434902

E(PMP3/6-311G(d,p)) (Hartree): -75.58468278

E(PUHF/6-311G(d,p)) (Hartree): -75.41283215

Point group : C<sub>2</sub>V

Cartesian coordinates (Angs):

|   |          |          |           |
|---|----------|----------|-----------|
| O | 0.000000 | 0.000000 | 0.108289  |
| H | 0.000000 | 0.000000 | -0.866311 |

Rotational constants (GHz): 0.0000000 561.1982077 561.1982077

Vibrational harmonic frequencies (cm-1):  
3710.8220 ( SG)  
Zero-point correction (Hartree): 0.008454

CH3COCH2OH..OH.a

-----  
E(UB+HF-LYP/6-311++G(2df,2pd)) (Hartree): -344.249776442  
E(UHF/6-311G(d,p)) (Hartree): -342.298250260  
E(CCSD(T)/6-311G(d,p)) (Hartree): -343.37533667  
E(MP2/6-311G(d,p)) (Hartree): -343.29332205  
E(MP3/6-311G(d,p)) (Hartree): -343.32585508  
E(PMP2/6-311G(d,p)) (Hartree): -343.29477124  
E(PMP3/6-311G(d,p)) (Hartree): -343.32665888  
E(PUHF/6-311G(d,p)) (Hartree): -342.30082860

Electronic state : 2-A

Cartesian coordinates (Angs):

|   |           |           |           |
|---|-----------|-----------|-----------|
| C | 0.849937  | -0.247319 | -0.030715 |
| O | 0.081168  | -1.158633 | -0.265175 |
| C | 2.333182  | -0.481944 | 0.093907  |
| C | 0.379687  | 1.183925  | 0.171705  |
| H | 2.802002  | -0.246035 | -0.865043 |
| H | 2.784303  | 0.169320  | 0.842968  |
| H | 2.531009  | -1.524435 | 0.328820  |
| H | 0.521386  | 1.394762  | 1.245645  |
| H | 1.067088  | 1.851131  | -0.354702 |
| O | -0.910006 | 1.478372  | -0.267737 |
| H | -1.553311 | 0.838206  | 0.075864  |
| H | -1.753446 | -1.160514 | -0.064667 |
| O | -2.643145 | -0.826039 | 0.205630  |

Rotational constants (GHz): 4.8476100 2.1397700 1.5449900

Vibrational harmonic frequencies (cm-1):

|           |           |           |
|-----------|-----------|-----------|
| 57.9880   | 94.8549   | 118.2573  |
| 140.0415  | 178.9313  | 272.6751  |
| 383.2354  | 399.6478  | 409.1257  |
| 474.7712  | 621.6156  | 713.2113  |
| 804.6023  | 848.1774  | 977.2495  |
| 1076.6327 | 1127.1569 | 1201.3342 |
| 1246.5944 | 1366.7245 | 1391.7581 |
| 1419.6737 | 1461.3325 | 1467.0368 |
| 1480.2066 | 1765.1318 | 2930.8791 |
| 3035.8850 | 3054.7040 | 3094.9199 |
| 3143.9236 | 3457.0628 | 3664.7221 |

Zero-point correction (Hartree): 0.099966

CH3COCH2OH..OH.b

-----  
E(UB+HF-LYP/6-31G(d,p)) (Hartree): -344.104582591  
E(UHF/6-311G(d,p)) (Hartree): -342.300758672  
E(CCSD(T)/6-311G(d,p)) (Hartree): -343.37534907  
E(MP2/6-311G(d,p)) (Hartree): -343.29352831  
E(MP3/6-311G(d,p)) (Hartree): -343.32627248  
E(PMP2/6-311G(d,p)) (Hartree): -343.29495869  
E(PMP3/6-311G(d,p)) (Hartree): -343.32705402  
E(PUHF/6-311G(d,p)) (Hartree): -342.30332042

Electronic state : 2-A

Cartesian coordinates (Angs):

|   |           |           |           |
|---|-----------|-----------|-----------|
| C | 0.336004  | -0.610976 | -0.006502 |
| O | -0.620771 | -1.369399 | -0.077297 |
| C | 0.104103  | 0.901497  | 0.065406  |

|                                          |           |           |           |  |
|------------------------------------------|-----------|-----------|-----------|--|
| C                                        | 1.756339  | -1.113576 | 0.045081  |  |
| H                                        | -0.403797 | 1.096286  | 1.017609  |  |
| O                                        | 1.281300  | 1.682903  | 0.040116  |  |
| H                                        | -0.616941 | 1.173477  | -0.719437 |  |
| H                                        | 2.318095  | -0.749280 | -0.822707 |  |
| H                                        | 2.265492  | -0.710680 | 0.926470  |  |
| H                                        | 1.762240  | -2.203713 | 0.058035  |  |
| H                                        | -2.307019 | -0.493431 | -0.005502 |  |
| O                                        | -2.877905 | 0.312426  | 0.012251  |  |
| H                                        | 1.542265  | 1.818240  | -0.878933 |  |
| Rotational constants (GHz):              | 4.1417900 | 2.2024800 | 1.4719500 |  |
| Vibrational harmonic frequencies (cm-1): |           |           |           |  |
| 37.6426                                  | 66.4279   |           | 126.7850  |  |
| 136.0002                                 | 180.1835  |           | 265.9217  |  |
| 293.4908                                 | 458.0191  |           | 482.8975  |  |
| 511.8255                                 | 521.9931  |           | 727.2554  |  |
| 792.3303                                 | 837.8083  |           | 994.7686  |  |
| 1066.4049                                | 1117.3212 |           | 1216.2190 |  |
| 1253.8052                                | 1385.2075 |           | 1399.1829 |  |
| 1428.1903                                | 1463.0591 |           | 1479.5520 |  |
| 1504.7260                                | 1793.5656 |           | 3046.4920 |  |
| 3056.0505                                | 3105.0759 |           | 3117.9211 |  |
| 3176.4923                                | 3545.0560 |           | 3834.4035 |  |
| Zero-point correction (Hartree):         | 0.101201  |           |           |  |

CH3COCH2OH..OH.c

-----

E(UB+HF-LYP/6-31G(d,p)) (Hartree): -344.106550564  
E(UHF/6-311G(d,p)) (Hartree): -342.300650366  
E(CCSD(T)/6-311G(d,p)) (Hartree): -343.37536171  
E(MP2/6-311G(d,p)) (Hartree): -343.29353889  
E(MP3/6-311G(d,p)) (Hartree): -343.32624180  
E(PMP2/6-311G(d,p)) (Hartree): -343.29497045  
E(PMP3/6-311G(d,p)) (Hartree): -343.32702445  
E(PUHF/6-311G(d,p)) (Hartree): -342.30321285  
Electronic state : 2-A  
Cartesian coordinates (Angs):

|                                          |           |           |           |  |
|------------------------------------------|-----------|-----------|-----------|--|
| C                                        | 0.334612  | -0.599406 | 0.086680  |  |
| O                                        | -0.674243 | -1.292324 | 0.115096  |  |
| C                                        | 0.239060  | 0.906242  | 0.339325  |  |
| C                                        | 1.701671  | -1.188222 | -0.152078 |  |
| H                                        | 2.129278  | -0.778401 | -1.073489 |  |
| H                                        | 2.385713  | -0.897213 | 0.652051  |  |
| H                                        | 1.630220  | -2.273805 | -0.223969 |  |
| H                                        | 0.174082  | 1.029150  | 1.429489  |  |
| H                                        | -0.712218 | 1.265710  | -0.072938 |  |
| O                                        | 1.369570  | 1.643202  | -0.088826 |  |
| H                                        | 1.257146  | 1.851783  | -1.024350 |  |
| O                                        | -2.971939 | 0.332639  | -0.190682 |  |
| H                                        | -2.303385 | -0.377050 | -0.015066 |  |
| Rotational constants (GHz):              | 4.1121500 | 2.0780100 | 1.4386800 |  |
| Vibrational harmonic frequencies (cm-1): |           |           |           |  |
| 56.7382                                  | 86.0602   |           | 112.4927  |  |
| 123.1835                                 | 190.0850  |           | 259.8651  |  |
| 300.0050                                 | 447.3194  |           | 498.5578  |  |
| 519.2809                                 | 544.2303  |           | 684.4257  |  |
| 773.5788                                 | 852.8253  |           | 999.8660  |  |
| 1064.4497                                | 1105.4007 |           | 1210.8965 |  |
| 1263.2162                                | 1387.8832 |           | 1393.1668 |  |

|           |           |           |
|-----------|-----------|-----------|
| 1405.1829 | 1462.7860 | 1476.6350 |
| 1483.3371 | 1788.3975 | 3032.8431 |
| 3058.9943 | 3082.8343 | 3119.0463 |
| 3175.6281 | 3491.4506 | 3832.7616 |

Zero-point correction (Hartree): 0.100885

CH3COCH2OH..OH.d

-----  
E(UB+HF-LYP/6-311++G(2df,2pd)) (Hartree): -344.250828073  
E(UHF/6-311G(d,p)) (Hartree): -342.305938793  
E(CCSD(T)/6-311G(d,p)) (Hartree): -343.38205792  
E(MP2/6-311G(d,p)) (Hartree): -343.30081483  
E(MP3/6-311G(d,p)) (Hartree): -343.33304383  
E(PMP2/6-311G(d,p)) (Hartree): -343.30226582  
E(PMP3/6-311G(d,p)) (Hartree): -343.33384248  
E(PUHF/6-311G(d,p)) (Hartree): -342.30852393

Electronic state : 2-A

Cartesian coordinates (Angs):

|   |           |           |           |
|---|-----------|-----------|-----------|
| C | 1.265251  | 0.101858  | -0.041760 |
| O | 1.310847  | 1.286597  | -0.291599 |
| C | 2.433494  | -0.825050 | -0.226407 |
| C | -0.036527 | -0.488180 | 0.472711  |
| H | 2.521682  | -1.523949 | 0.606127  |
| H | 2.277339  | -1.418630 | -1.130650 |
| H | 3.350893  | -0.253253 | -0.336918 |
| H | -0.338548 | -1.322182 | -0.169682 |
| H | 0.139448  | -0.900353 | 1.473325  |
| O | -1.047853 | 0.489598  | 0.514306  |
| H | -0.628312 | 1.324005  | 0.243748  |
| H | -2.747302 | 0.016425  | -0.086405 |
| O | -3.581558 | -0.357924 | -0.451058 |

Rotational constants (GHz): 7.4223800 1.3031100 1.1933400

Vibrational harmonic frequencies (cm-1):

|           |           |           |
|-----------|-----------|-----------|
| 14.6883   | 40.1374   | 54.3235   |
| 125.9459  | 175.6499  | 289.7040  |
| 415.4349  | 426.9264  | 458.4395  |
| 526.1797  | 619.9198  | 650.8425  |
| 811.4262  | 864.4741  | 976.6768  |
| 1097.7816 | 1106.3765 | 1209.5197 |
| 1257.8556 | 1299.3792 | 1394.9257 |
| 1437.1670 | 1464.4242 | 1477.6171 |
| 1485.9475 | 1778.9384 | 3003.9255 |
| 3032.5854 | 3038.2488 | 3094.7727 |
| 3146.0265 | 3518.6187 | 3653.3910 |

Zero-point correction (Hartree): 0.100122

CH3COCH2OH..OH.e

-----  
E(UB+HF-LYP/6-311++G(2df,2pd)) (Hartree): -344.249601000  
E(UHF/6-311G(d,p)) (Hartree): -342.305743235  
E(CCSD(T)/6-311G(d,p)) (Hartree): -343.38058369  
E(MP2/6-311G(d,p)) (Hartree): -343.29902448  
E(MP3/6-311G(d,p)) (Hartree): -343.33159375  
E(PMP2/6-311G(d,p)) (Hartree): -343.30049593  
E(PMP3/6-311G(d,p)) (Hartree): -343.33241322  
E(PUHF/6-311G(d,p)) (Hartree): -342.30834421

Electronic state : 2-A

Cartesian coordinates (Angs):

|   |          |          |           |
|---|----------|----------|-----------|
| C | 0.258183 | 0.349525 | -0.012754 |
|---|----------|----------|-----------|

|                                                           |           |           |           |
|-----------------------------------------------------------|-----------|-----------|-----------|
| O                                                         | -0.406845 | -0.669448 | -0.000223 |
| C                                                         | -0.353135 | 1.721454  | 0.017001  |
| C                                                         | 1.765106  | 0.242428  | -0.038793 |
| H                                                         | -0.571809 | 1.975683  | 1.057229  |
| H                                                         | 0.321375  | 2.479127  | -0.378694 |
| H                                                         | -1.292791 | 1.729105  | -0.531243 |
| H                                                         | 2.112821  | 0.728085  | -0.961548 |
| H                                                         | 2.168547  | 0.835933  | 0.791696  |
| O                                                         | 2.216590  | -1.077415 | 0.033455  |
| H                                                         | 1.432098  | -1.644953 | 0.021060  |
| H                                                         | -2.317899 | -0.771897 | 0.008851  |
| O                                                         | -3.293904 | -0.654579 | -0.008242 |
| Rotational constants (GHz): 5.5607300 1.5971600 1.2603500 |           |           |           |
| Vibrational harmonic frequencies (cm-1):                  |           |           |           |
| 32.5174                                                   | 38.8844   | 66.8767   |           |
| 139.2162                                                  | 142.8714  | 288.1649  |           |
| 381.4854                                                  | 409.1436  | 456.0978  |           |
| 480.8371                                                  | 576.8796  | 622.7873  |           |
| 820.0247                                                  | 854.1660  | 995.0657  |           |
| 1091.7730                                                 | 1117.5759 | 1206.4528 |           |
| 1259.2267                                                 | 1306.2561 | 1395.5645 |           |
| 1432.0847                                                 | 1467.3957 | 1475.5187 |           |
| 1483.4613                                                 | 1758.3748 | 2978.1243 |           |
| 3002.3347                                                 | 3040.2216 | 3103.4681 |           |
| 3139.0741                                                 | 3545.8344 | 3720.8790 |           |

Zero-point correction (Hartree): 0.099849

TS\_Habs.a.2

-----  
E(UB+HF-LYP/6-311++G(2df,2pd)) (Hartree): -344.241989469

E(UHF/6-311G(d,p)) (Hartree): -342.276366061

E(CCS(D)/6-311G(d,p)) (Hartree): -343.36532202

E(MP2/6-311G(d,p)) (Hartree): -343.28055556

E(MP3/6-311G(d,p)) (Hartree): -343.31164044

E(PMP2/6-311G(d,p)) (Hartree): -343.28335984

E(PMP3/6-311G(d,p)) (Hartree): -343.31339053

E(PUHF/6-311G(d,p)) (Hartree): -342.28065188

Electronic state : 2-A

Cartesian coordinates (Angs):

|   |           |           |           |
|---|-----------|-----------|-----------|
| C | 0.579012  | -0.559952 | 0.115775  |
| O | 0.044048  | -1.641773 | 0.201466  |
| C | -0.219347 | 0.697921  | 0.459251  |
| C | 2.019892  | -0.391425 | -0.290134 |
| H | 2.075261  | 0.104979  | -1.261841 |
| H | 2.544857  | 0.253777  | 0.415170  |
| H | 2.497401  | -1.364860 | -0.354732 |
| H | -0.297870 | 0.769970  | 1.546191  |
| H | -1.291319 | 0.490653  | 0.087078  |
| O | 0.278830  | 1.914729  | -0.008065 |
| H | 0.197313  | 1.958780  | -0.965997 |
| O | -2.548822 | -0.219986 | -0.318400 |
| H | -2.195430 | -1.116334 | -0.175225 |

Rotational constants (GHz): 3.7973400 2.6091100 1.6604900

Vibrational harmonic frequencies (cm-1):

|           |          |          |
|-----------|----------|----------|
| -217.9093 | 49.0024  | 127.7519 |
| 132.1831  | 144.1763 | 256.0052 |
| 349.9615  | 388.8425 | 477.9245 |
| 509.2667  | 545.2784 | 673.7475 |
| 765.8888  | 860.4329 | 991.7951 |

|           |           |           |
|-----------|-----------|-----------|
| 1059.2112 | 1122.1480 | 1197.0933 |
| 1235.4418 | 1316.0953 | 1333.7106 |
| 1388.5411 | 1399.8038 | 1459.0625 |
| 1470.7823 | 1760.9755 | 1948.9591 |
| 3039.5958 | 3069.8477 | 3094.8408 |
| 3151.8497 | 3699.2372 | 3820.6240 |

Zero-point correction (Hartree): 0.097597

TS\_Habs.d.2

-----

Electronic state : 2-A

Cartesian coordinates (Angs):

|   |           |           |           |
|---|-----------|-----------|-----------|
| C | -0.697994 | 0.542394  | -0.018485 |
| O | -1.643977 | 0.474576  | -0.773508 |
| C | -0.049039 | 1.835308  | 0.383667  |
| C | -0.125010 | -0.747773 | 0.549807  |
| H | -0.179417 | 1.995869  | 1.456266  |
| H | 1.024193  | 1.791194  | 0.193241  |
| H | -0.494709 | 2.662527  | -0.161899 |
| H | 0.922072  | -0.815762 | 0.216349  |
| H | -0.085785 | -0.688947 | 1.643341  |
| O | -0.855879 | -1.863641 | 0.144354  |
| H | -1.519905 | -1.535445 | -0.484042 |
| H | 3.059624  | -0.919580 | -0.844816 |
| O | 2.813129  | -0.144614 | -0.309393 |

Rotational constants (GHz): 3.3349400 2.2550800 1.5294700

Vibrational harmonic frequencies (cm-1):

|           |           |           |
|-----------|-----------|-----------|
| -68.8533  | 34.7608   | 56.9144   |
| 67.8898   | 96.4856   | 136.7321  |
| 279.6469  | 333.5815  | 408.2498  |
| 432.6347  | 506.6600  | 622.3895  |
| 803.1430  | 853.4938  | 973.9210  |
| 1091.0646 | 1122.5408 | 1204.0343 |
| 1222.8611 | 1295.3375 | 1396.3890 |
| 1415.3111 | 1447.6655 | 1469.9547 |
| 1478.2081 | 1774.3999 | 2875.5241 |
| 3017.8611 | 3039.3351 | 3097.2554 |
| 3146.3950 | 3667.1322 | 3719.5477 |

Zero-point correction (Hartree): 0.098160

TS\_Habs.e.1

-----

E(UB+HF-LYP/6-311++G(2df,2pd)) (Hartree): -344.240680528

E(UHF/6-311G(d,p)) (Hartree): -342.268981047

E(CCSD(T)/6-311G(d,p)) (Hartree): -343.36080028

E(MP2/6-311G(d,p)) (Hartree): -343.27653944

E(MP3/6-311G(d,p)) (Hartree): -343.30691455

E(PMP2/6-311G(d,p)) (Hartree): -343.28040091

E(PMP3/6-311G(d,p)) (Hartree): -343.30936393

E(PUHF/6-311G(d,p)) (Hartree): -342.27449763

Electronic state : 2-A

Cartesian coordinates (Angs):

|   |           |           |           |
|---|-----------|-----------|-----------|
| C | -0.241376 | 0.476916  | 0.172907  |
| O | -0.569043 | 1.315424  | -0.641044 |
| C | 1.057857  | 0.544919  | 0.908206  |
| C | -1.151658 | -0.701765 | 0.450006  |
| H | 1.464095  | 1.551518  | 0.936383  |
| H | 1.049363  | 0.069493  | 1.887615  |
| H | 1.818028  | -0.110085 | 0.294083  |

|                                          |           |           |           |
|------------------------------------------|-----------|-----------|-----------|
| H                                        | -0.580637 | -1.621658 | 0.268049  |
| H                                        | -1.406678 | -0.697268 | 1.518030  |
| O                                        | -2.308928 | -0.668766 | -0.333913 |
| H                                        | 2.836484  | -0.140667 | -1.245498 |
| O                                        | 2.763475  | -0.784773 | -0.521327 |
| H                                        | -2.253625 | 0.133168  | -0.875106 |
| Rotational constants (GHz):              | 5.2078300 | 1.6881600 | 1.5445000 |
| Vibrational harmonic frequencies (cm-1): |           |           |           |
| -433.1239                                | 29.8438   |           | 63.7769   |
| 139.6501                                 | 154.0276  |           | 269.5966  |
| 333.9008                                 | 398.7629  |           | 410.8956  |
| 496.8314                                 | 617.8095  |           | 772.9560  |
| 815.6770                                 | 868.0879  |           | 982.2773  |
| 1059.8007                                | 1116.4534 |           | 1197.2941 |
| 1206.8557                                | 1253.1652 |           | 1301.6693 |
| 1354.1133                                | 1432.1152 |           | 1439.2362 |
| 1478.9330                                | 1485.8249 |           | 1754.3945 |
| 2984.3560                                | 3002.6688 |           | 3085.2300 |
| 3167.5620                                | 3706.5231 |           | 3738.0010 |
| Zero-point correction (Hartree):         | 0.095953  |           |           |

TS\_introt.a.c

-----  
E(UB+HF-LYP/6-311++G(2df,2pd)) (Hartree): -344.243284240  
E(UHF/6-311G(d,p)) (Hartree): -342.299048052  
E(CCSD(T)/6-311G(d,p)) (Hartree): -343.37438341  
E(MP2/6-311G(d,p)) (Hartree): -343.29243989  
E(MP3/6-311G(d,p)) (Hartree): -343.32522982  
E(PMP2/6-311G(d,p)) (Hartree): -343.29387670  
E(PMP3/6-311G(d,p)) (Hartree): -343.32601893  
E(PUHF/6-311G(d,p)) (Hartree): -342.30161386

Electronic state : 2-A

Cartesian coordinates (Angs):

|                                          |           |           |           |
|------------------------------------------|-----------|-----------|-----------|
| C                                        | 0.519294  | -0.552827 | 0.148750  |
| O                                        | -0.418883 | -1.323325 | 0.084551  |
| C                                        | 0.323863  | 0.882034  | 0.642443  |
| C                                        | 1.911351  | -0.952845 | -0.251134 |
| H                                        | 2.362677  | -0.182875 | -0.876308 |
| H                                        | 2.528026  | -1.032902 | 0.648466  |
| H                                        | 1.900176  | -1.910608 | -0.763538 |
| O                                        | 0.698433  | 1.820974  | -0.357343 |
| H                                        | -0.711337 | 1.013681  | 0.958521  |
| H                                        | 0.979088  | 1.058296  | 1.498188  |
| H                                        | -0.031043 | 1.915530  | -0.977568 |
| O                                        | -2.952277 | -0.056719 | -0.185391 |
| H                                        | -2.172826 | -0.646724 | -0.062649 |
| Rotational constants (GHz):              | 3.8741000 | 2.1517600 | 1.5034700 |
| Vibrational harmonic frequencies (cm-1): |           |           |           |
| -51.3186                                 | 38.3310   |           | 66.2311   |
| 115.7398                                 | 171.2810  |           | 247.8971  |
| 320.5090                                 | 400.4905  |           | 440.2262  |
| 521.9513                                 | 593.9020  |           | 616.3803  |
| 787.9861                                 | 875.4106  |           | 1019.9597 |
| 1057.8756                                | 1067.1973 |           | 1182.8835 |
| 1264.9020                                | 1376.9280 |           | 1388.4019 |
| 1392.0041                                | 1463.1029 |           | 1475.4041 |
| 1485.6323                                | 1761.1133 |           | 3034.4606 |
| 3040.5896                                | 3093.0024 |           | 3099.1676 |
| 3151.2498                                | 3503.0170 |           | 3826.0851 |

Zero-point correction (Hartree): 0.099964
